# Supplementary material for: Highly sensitive simultaneous electrochemical determination of hydroquinone, catechol and resorcinol based on carbon dot/reduced graphene oxide composite modified electrodes
Source: Royal Society of Chemistry journal article supplement (doi:10.1039/c5ay00848d), 2015-01-01
Supplement: c5ay00848d1.pdf [file c5ay00848d1.pdf]

## Supplementary Information

# High sensitive simultaneous electrochemical determination of hydroquinone, catechol and resorcinol based on carbon dots/reduced graphene oxide composite modified electrode

Wuxiang Zhang<sup>a</sup>, Jianzhong Zheng<sup>a</sup>, Zhongqiu Lin<sup>a</sup>, Ling Zhong<sup>a</sup>, Jiangu Shi<sup>a</sup>,  
Chan Wei<sup>a</sup>, Hanqiang Zhang<sup>a</sup>, Aiyu Hao<sup>b</sup>, Shirong Hu<sup>a, b1</sup>

<sup>a</sup> College of Chemistry and Environment, Minnan Normal University,  
Zhangzhou 363000, P.R. China.

<sup>b</sup> School of Chemistry and Chemical Engineering, Shandong University,  
Jinan 250100, P.R. China.

---

1 Corresponding author: Tel.: +86 596 2528075. Fax: +86 596 2528075  
E-mail address: Hushirong6666@163.com (prof. S. Hu).

**Fig. S1.** CV (A) and EIS (B) of 1.0 mM  $[\text{Fe}(\text{CN})_6]^{3-/4-}$  and 0.1 M KCl solution recorded on the GCE, r-GO/GCE, CDs/GCE and CDs/r-GO/GCE.

**Fig. S2.** The oxidation peak current of 0.2 mM HQ, CC and RC on the CDs/r-GO/GCE at different pH ( 5.5, 6.0, 6.5, 7.0, 7.5, 8.0,) (scan rate:  $0.1 \text{ V s}^{-1}$ ).

**Fig. S3.** Stability of 0.2 mM HQ, CC and RC on the CDs/r-GO/GCE at ambient conditions over two weeks

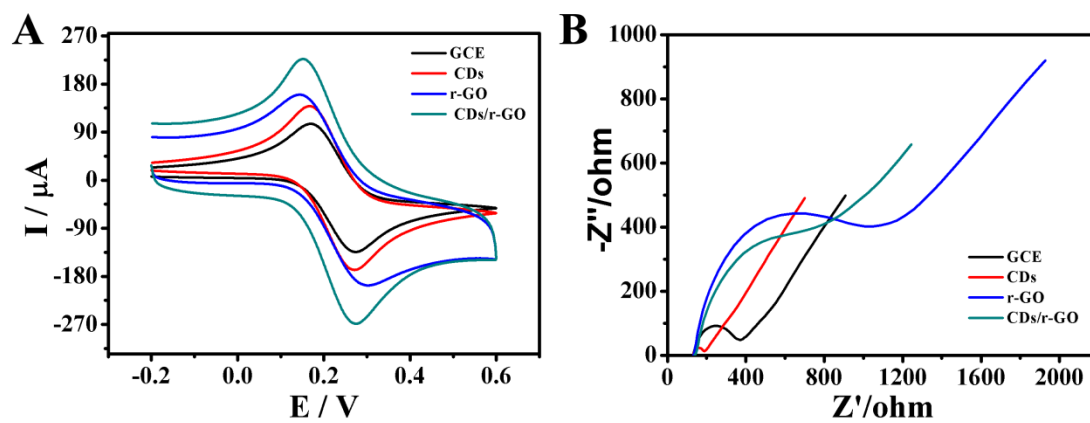

**Fig. S1.** CV (A) and EIS (B) of 1.0 mM  $[\text{Fe}(\text{CN})_6]^{3-/4-}$  and 0.1 M KCl solution recorded on the GCE, CDs/GCE, r-GO/GCE and CDs/r-GO/GCE.

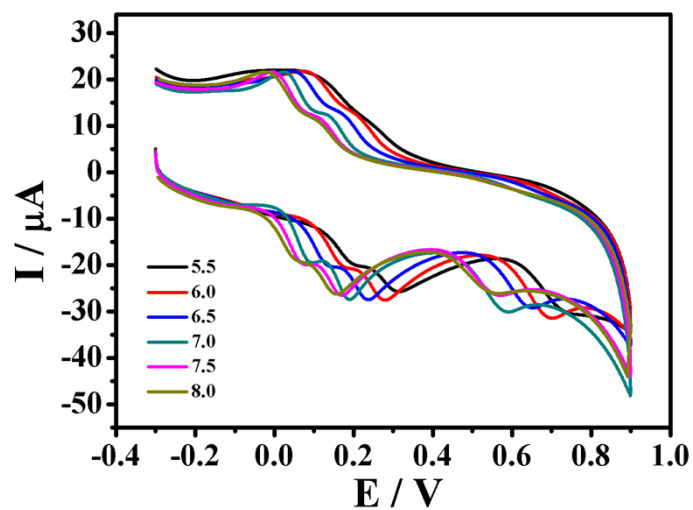

**Fig. S2.** The oxidation peak current of 0.2 mM HQ, CC and RC on the CDs/r-GO/GCE at different pH ( 5.5, 6.0, 6.5, 7.0, 7.5, 8.0,) (scan rate: 0.1 V s<sup>-1</sup>).

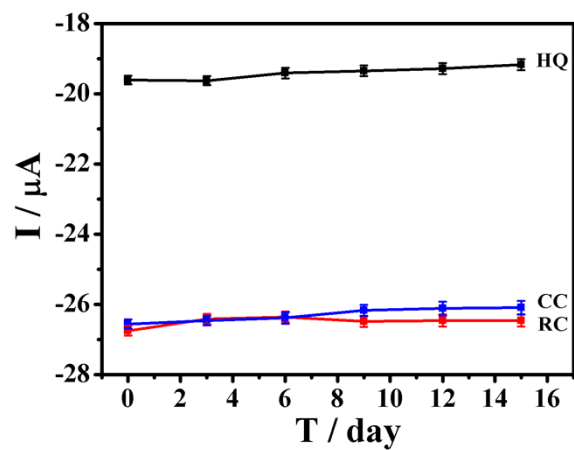

**Fig. S3.** Stability of 0.2 mM HQ, CC and RC on the CDs/r-GO/GCE at ambient conditions over two weeks
